# Supplementary material for: Towards robust cell culture processes — Unraveling the impact of media preparation by spectroscopic online monitoring
Source: PubMed Central journal article supplement (PMC6999248; doi:10.1002/elsc.201900050), 2019-08-22
Supplement: ELSC-19-666-s001.pdf [file ELSC-19-666-s001.pdf]

**Supplementary Table 1.** List of reported components included in the LC-MS method.

---

| <b>Analyte</b>           |
|--------------------------|
| L-methionine sulfoxide   |
| Tyrosine variant         |
| Taurine                  |
| Pyridoxamine             |
| Pyridoxal                |
| Cyanocobalamin           |
| Riboflavin               |
| 5-hydroxyl- L-tryptophan |
| 3-amino-propionamide     |

---

**Supplementary Table 2.** PQ data of the conducted fed-batch processes for cell line A.

| Sample ID   | Aggregates/Fragments |              |          | Charge Variants |          |          |           | Glycosylation pattern |            |           |            |            |           |            |           |
|-------------|----------------------|--------------|----------|-----------------|----------|----------|-----------|-----------------------|------------|-----------|------------|------------|-----------|------------|-----------|
|             | HMWC [%]             | Mono mer [%] | LMWC [%] | APG [%]         | Main [%] | BP G [%] | Man 5 [%] | A2G 0 [%]             | A2FG 0 [%] | A2G 1 [%] | A2FG 1 [%] | A2FG 1 [%] | A2G 2 [%] | A2FG 2 [%] | A2G 2 [%] |
| N1_P-media  | 0.3                  | 98.4         | 1.3      | 30.8            | 62.4     | 6.8      | 2.9       | 2.3                   | 37.3       | 5.8       | 28.5       | 9.4        | -         | 7.5        | 1.5       |
| N3_P-media  | 0.4                  | 98.4         | 1.3      | 30.7            | 62.8     | 6.5      | 3.0       | 2.2                   | 36.6       | 5.8       | 28.7       | 9.7        | -         | 7.4        | -         |
| N5_P-media  | 0.4                  | 98.3         | 1.3      | 29.6            | 63.3     | 7        | 3.2       | 1.7                   | 38.1       | 4.9       | 29.2       | 10.7       | 2.3       | 7.6        | -         |
| N7_P-media  | 0.4                  | 98.3         | 1.4      | 34.4            | 59.8     | 5.8      | 3.6       | 1.9                   | 37.3       | 5.0       | 28.8       | 10.0       | -         | 7.7        | 0.8       |
| N9_P-media  | 0.3                  | 98.4         | 1.3      | 34.3            | 59.7     | 6        | 2.5       | 2.9                   | 35.7       | 6.4       | 28.1       | 10.0       | -         | 7.7        | 0.9       |
| N11_P-media | 0.4                  | 98.2         | 1.4      | 35.5            | 58.6     | 5.9      | 4.3       | 1.6                   | 37.4       | 5.1       | 28.8       | 10.0       | 1.9       | 7.5        | -         |
| N12_P-media | 0.4                  | 98.3         | 1.3      | 35.3            | 59       | 5.8      | 2.4       | 2.9                   | 34.2       | 6.4       | 28.0       | 9.1        | 1.2       | 7.7        | -         |
| N13_P-media | 0.4                  | 98.3         | 1.3      | 33.3            | 60.8     | 5.9      | 2.6       | 2.3                   | 35.8       | 5.9       | 29.6       | 10.6       | 2.1       | 7.9        | -         |
| N17_P-media | 0.4                  | 98.3         | 1.3      | 34.2            | 59.6     | 6.1      | 2.2       | 3.2                   | 35.7       | 6.3       | 27.6       | 9.7        | -         | 7.5        | -         |
| N6_F-media  | 0.5                  | 98.1         | 1.4      | 37              | 57.4     | 5.6      | 4.1       | 3.8                   | 36.8       | 4.6       | 26.0       | 9.5        | 1.2       | 7.1        | -         |
| N8_F-media  | 0.5                  | 98.2         | 1.3      | 38              | 57       | 5.1      | 3.8       | 2.8                   | 37.8       | 5.9       | 26.8       | 9.8        | 1.2       | 7.3        | -         |
| N9_F-media  | 0.5                  | 98.2         | 1.3      | 36.7            | 58       | 5.4      | 2.5       | 3.4                   | 37.2       | 8.5       | 25.9       | 9.6        | -         | 6.1        | 0.8       |
| N11_F-media | 0.4                  | 98.2         | 1.4      | 35.9            | 58.4     | 5.6      | 3.9       | 2.0                   | 37.7       | 4.5       | 26.7       | 10.6       | -         | 7.4        | -         |
| N17_F-media | 0.3                  | 98.2         | 1.4      | 32.7            | 60.8     | 6.5      | 3.0       | 1.8                   | 36.9       | 6.5       | 28.0       | 10.9       | 1.6       | 7.4        | -         |
| N18_F-media | 0.4                  | 98.3         | 1.2      | 34.4            | 59.7     | 5.9      | 3.1       | 3.2                   | 36.7       | 6.3       | 26.5       | 10.7       | 1.2       | 7.2        | -         |
